# Supplementary material
Source: PubMed Central journal article supplement (PMC6692674)
Supplement: jama-322-546-s001.pdf [file jama-322-546-s001.pdf]

## Supplementary Online Content

Wang M, Aaron CP, Madrigano J, et al. Association between long-term exposure to ambient air pollution and change in qualitatively assessed emphysema and lung function. *JAMA*. doi:10.1001/jama.2019.10255

### **eMethods.** Statistical modeling

**eTable 1** Unadjusted percent emphysema progression and lung function decline per year by quartile of O<sub>3</sub> exposure concentrations in the MESA cohort

**eTable 2** Descriptive characteristics [mean (SD) or %] of study participants at baseline and unadjusted longitudinal outcomes by study areas in the analysis of lung function

**eTable 3** Pearson correlation coefficients between predicted air pollution exposures at the MESA participants' homes within the MESA cities (N=6860)

**eTable 4** Main and sensitivity analyses of effect estimates (95% CIs) of air pollution concentrations, assessed at baseline, with longitudinal changes of percent emphysema on CT, per 10 years from staged models

**eTable 5** Main and sensitivity analyses of effect estimates (95% CIs) of long-term air pollution concentrations, assessed during follow-up, with longitudinal change of percent emphysema on CT over 10 years from staged models

**eTable 6** Effect estimates (95% CIs) for the associations between air pollutant exposures at baseline or over follow-up and progression of percent emphysema in single-pollutant, multiple-pollutant and linear combination models, per IQR increment for O<sub>3</sub> (3 ppb), PM<sub>2.5</sub> (2 µg/m<sup>3</sup>), NO<sub>x</sub> (10 ppb) and black carbon (0.2 µg/m<sup>3</sup>).

**eTable 7** Longitudinal changes in percent emphysema (95% CI) per over ten years per increase of O<sub>3</sub>, PM<sub>2.5</sub>, NO<sub>x</sub> and black carbon, assessed at baseline, stratified by potential effect modifiers

**eTable 8** Longitudinal changes in percent emphysema (95% CI) over ten years per increase of long-term O<sub>3</sub>, PM<sub>2.5</sub>, NO<sub>x</sub> concentration, assessed during following, stratified by potential effect modifiers

**eTable 9** Multiplicative interactions between air pollutant exposures for effect of air pollution on progression of percent emphysema over ten years (N=6860)

**eTable 10** Main and sensitivity analyses of effect estimates (95% CIs) of long-term air pollution concentrations, assessed during following with longitudinal changes of lung function over 10 years from staged models

**eTable 11** Longitudinal changes in lung function (95% CI) per 3 ppb increase of O<sub>3</sub> assessed during following over 10 years stratified by personal factors

**eTable 12** Main and sensitivity analyses of effect estimates (95% CIs) of exposure to air pollution concentrations assessed at baseline with longitudinal changes of lung function over 10 years from staged models

**eFigure 1** Participant recruitment, retention, and flow of outcome testing in the analysis of percent emphysema and lung function in the Multi-Ethnic Study of Atherosclerosis.

**eFigure 2** Concentration-response curves with 95%CI for the overall change of percent emphysema (progression rate associated with air pollution concentrations, assessed at baseline and over follow-up (N=6860))

**eFigure 3** Concentration-response curve with 95%CI for the change of FEV1 (rate of change associated with air pollution concentrations, assessed at baseline and over follow-up, N=3636).

**eFigure 4** Effect estimates for the associations between air pollutants and lung function decline (N=3636). Results from single-pollutant model, multiple-pollutant model and linear combination model for the effect estimates of multiple air pollutant exposures (A: at baseline for FEV1, B: over follow-up for FEV1, C: at baseline for FVC, and D: over follow-up for FVC), from multi-pollutant models.

This supplementary material has been provided by the authors to give readers additional information about their work.

## eMethods

### Statistical modeling

The extent of disease at baseline can be likely associated with progression of disease due to the exposure of interest, measured confounders and unmeasured confounding factors. We developed a statistical model to better understand the relationship between long-term air pollution exposure and the progression of the measured outcomes adjusting for a wide number of potential confounders and to avoid bias in the analysis. We fit a longitudinal mixed model with random slopes and intercepts, which jointly models the cross-sectional and longitudinal relationships between long-term exposure to air pollution and the outcomes. This modeled examined the included three components, 1) the cross-sectional relationship between the baseline outcome and values of covariates at baseline, 2) the longitudinal relationship to model rate of change, and 3) time-varying “transient” terms that adjust for variables relevant to specific measurements without modification for the slope), as follows:

$$Y_{iv} = [\alpha_0 + X_{i0}\alpha_1 + a_i] + [t_{iv}\beta_0 + W_{iv}t_{iv}\beta_1 + t_{iv}b_i] + [U_{iv}\gamma_1 + \epsilon_{iv}]$$

Where:

$Y_{iv}$  = Outcome measurement for subject  $i$  at  $v^{\text{th}}$  follow-up exam

$X_{i0}$  = time-invariant cross-sectional confounders and risk factors at Exam 1 for subject  $i$ , including mean air pollution exposure during the year of baseline.

$W_{iv}$  = possibly time-varying longitudinal confounders and risk factors at exam  $v$  for subject  $i$ , including mean air pollution exposure during the time period between baseline ( $v = 0$ ) and  $v^{\text{th}}$  follow-up exam, rounded to the nearest whole year as well as air pollution exposure for the years at baseline exam

$U_{iv}$  = time-varying variables to adjust measurements at exam  $v$  for subject  $i$ , primarily CT scanner in the percent emphysema analyses

$t_{iv}$  = time in years from baseline ( $v = 0$ ) to the  $v^{\text{th}}$  follow-up exam for subject  $i$

$\beta_0$  = Outcome progression (annual rate of change) in average participants in the reference group

$\beta_1$  = coefficients for interaction between risk factors and time; this includes the air pollution exposure by time interaction which is interpreted as a rate (association between air pollution and annual progression) and the primary parameter of interest in this study

$\alpha_0$  = average percent emphysema or lung function measurements at baseline for participants in the reference group

$\alpha_1$  = coefficients for cross-sectional associations between baseline outcome measurements and risk factors (including baseline air pollution exposure)

$\gamma_1$  = coefficients for cross-sectional associations between time-varying variables and outcome measurements at all exams

$a_i$  = subject-specific random intercept, which is nested within a neighborhood-specific intercept (in a sensitivity analysis)

$b_i$  = subject-specific random slope

$\epsilon_{iv}$  = error associated with  $Y_{iv}$

The  $\alpha_1$  characterizes the cross-sectional association between air pollution levels preceding the baseline exam and baseline outcomes. The longitudinal terms model an overall progression rate ( $\beta_0$ ), interpreted as the rate of change in outcome for a subject with no additional risk factors (i.e. all terms  $W_i=0$ ), and incorporate terms which adjust that rate ( $\beta_1$ ) according to the association between progression rate and risk factors.  $\beta_1$  which shows the longitudinal effect of air pollution is the main interest of this study.

**eTable 1 Unadjusted annual percent emphysema progression and lung function decline by quartile of O<sub>3</sub> exposure concentrations in the MESA cohort**

|                                           | N of participants | Quartile of long-term O <sub>3</sub> concentration |              |              |              |
|-------------------------------------------|-------------------|----------------------------------------------------|--------------|--------------|--------------|
|                                           |                   | Q1                                                 | Q2           | Q3           | Q4           |
| <b>Percent emphysema progression/year</b> |                   |                                                    |              |              |              |
| Winston-Salem, NC                         | 1037              | 0.02 (0.28)                                        | 0.04 (0.23)  | 0.09 (0.31)  | 0.14 (0.35)  |
| New York, NY                              | 1182              | 0.07 (0.45)                                        | 0.10 (0.32)  | 0.05 (0.52)  | 0.09 (0.59)  |
| Baltimore, MD                             | 1054              | 0.09 (0.48)                                        | 0.07 (0.34)  | 0.09 (0.44)  | 0.11 (0.40)  |
| St. Paul, MN                              | 1021              | 0.02 (0.15)                                        | 0.07 (0.22)  | 0.06 (0.29)  | 0.09 (0.26)  |
| Chicago, IL                               | 1142              | 0.12 (0.45)                                        | 0.07 (0.57)  | 0.12 (0.66)  | 0.09 (0.47)  |
| Los Angeles, CA                           | 1424              | 0.00 (0.61)                                        | 0.02 (0.47)  | 0.01 (0.36)  | 0.03 (0.41)  |
| All regions <sup>a</sup>                  | 6860              | 0.05 (0.41)                                        | 0.06 (0.46)  | 0.08 (0.53)  | 0.09 (0.45)  |
| <b>FEV<sub>1</sub> (ml/year)</b>          |                   |                                                    |              |              |              |
| Winston-Salem, NC                         | 498               | -18.7 (38.8)                                       | -27.2 (37.2) | -25.2 (38.2) | -30.5 (31.6) |
| New York, NY                              | 761               | -28.2 (24.1)                                       | -29.0 (32.0) | -30.4 (27.5) | -41.3 (38.8) |
| Baltimore, MD                             | 435               | -29.4 (40.7)                                       | -36.0 (35.8) | -36.9 (41.1) | -34.0 (38.0) |
| St. Paul, MN                              | 507               | -36.4 (28.7)                                       | -40.8 (28.3) | -42.6 (35.4) | -29.2 (29.8) |
| Chicago, IL                               | 666               | -22.4 (23.4)                                       | -20.7 (35.8) | -28.9 (29.8) | -30.9 (29.4) |
| Los Angeles, CA                           | 769               | -33.2 (32.9)                                       | -35.6 (26.6) | -38.6 (31.6) | -37.8 (50.6) |
| All regions <sup>a</sup>                  | 3636              | -28.3 (34.5)                                       | -31.3 (35.0) | -32.6 (34.1) | -33.9 (33.2) |
| <b>FVC (ml/year)</b>                      |                   |                                                    |              |              |              |
| Winston-Salem, NC                         | 498               | -19.3 (52.9)                                       | -19.3 (51.2) | -32.2 (46.1) | -29.9 (45.6) |
| New York, NY                              | 761               | -28.6 (31.3)                                       | -33.7 (40.3) | -33.0 (32.0) | -63.9 (70.7) |
| Baltimore, MD                             | 435               | -37.8 (55.1)                                       | -38.6 (50.0) | -28.4 (62.3) | -31.6 (61.8) |
| St. Paul, MN                              | 507               | -44.0 (43.0)                                       | -47.2 (42.5) | -49.1 (45.8) | -43.3 (36.9) |
| Chicago, IL                               | 666               | -19.3 (32.8)                                       | -20.5 (40.3) | -27.8 (49.2) | -25.8 (42.9) |
| Los Angeles, CA                           | 769               | -34.8 (37.8)                                       | -33.3 (42.6) | -35.8 (41.3) | -38.4 (32.1) |
| All regions <sup>a</sup>                  | 3636              | -30.5 (41.7)                                       | -33.6 (43.4) | -34.1 (47.9) | -39.1 (52.2) |

<sup>a</sup>O<sub>3</sub> exposure concentrations were centralized to city means.

**eTable 2 Descriptive characteristics [mean (SD) or %] of study participants at baseline in 2004-2007 and unadjusted longitudinal outcomes by study areas in the analysis of lung function.**

| Site                                                          | Winston-Salem, NC | New York, NY | Baltimore, MD | St. Paul, MN | Chicago, IL | Los Angeles, CA |
|---------------------------------------------------------------|-------------------|--------------|---------------|--------------|-------------|-----------------|
| <b>N Participants</b>                                         |                   |              |               |              |             |                 |
| Baseline (n=3636)                                             | 498               | 761          | 435           | 507          | 666         | 769             |
| Follow-up (n=2772)                                            | 367               | 571          | 318           | 423          | 551         | 542             |
| <b>Baseline age</b>                                           | 59.8(10.7)        | 62.6(10.3)   | 64.8(9.5)     | 60.2(9.5)    | 63.8(9.6)   | 66.6(9.0)       |
| <b>Female (%)</b>                                             | 257 (51.6)        | 413 (54.3)   | 211 (48.5)    | 244 (48.1)   | 345 (51.8)  | 382 (49.7)      |
| <b>Race (%)</b>                                               |                   |              |               |              |             |                 |
| White                                                         | 270 (54.2)        | 160 (21.0)   | 211 (48.5)    | 291 (57.3)   | 297 (44.5)  | 65 (8.4)        |
| Chinese                                                       | 0 (0)             | 0 (0)        | 0 (0)         | 0 (0)        | 230 (34.6)  | 359 (46.8)      |
| Black                                                         | 228 (45.8)        | 244 (32.1)   | 224 (51.5)    | 0 (0)        | 139 (20.9)  | 84 (10.9)       |
| Hispanic                                                      | 0 (0)             | 357 (46.9)   | 0 (0)         | 216 (42.7)   | 0 (0)       | 261 (33.9)      |
| <b>Education (%)</b>                                          |                   |              |               |              |             |                 |
| ≤ High school                                                 | 135 (27.2)        | 336 (44.2)   | 107 (24.5)    | 199 (39.2)   | 99 (14.9)   | 375 (48.7)      |
| ≥Some college                                                 | 363 (72.8)        | 425 (55.8)   | 328 (75.5)    | 308 (60.8)   | 567 (85.1)  | 394 (51.3)      |
| <b>Smoking status (%)</b>                                     |                   |              |               |              |             |                 |
| Never                                                         | 202 (40.5)        | 350 (46.0)   | 180 (41.3)    | 191 (37.6)   | 335 (50.4)  | 453 (58.8)      |
| Former                                                        | 244 (49.0)        | 329 (43.2)   | 215 (49.6)    | 249 (49.2)   | 279 (41.9)  | 267 (34.7)      |
| Current                                                       | 52 (10.5)         | 82 (10.8)    | 40 (9.1)      | 67 (13.3)    | 52 (7.8)    | 49 (6.4)        |
| <b>Pack-years of smoking in ever-smokers, median (q1, q3)</b> | 18 (4, 38)        | 14 (3, 32)   | 18 (5, 35)    | 13 (4, 30)   | 17 (4, 39)  | 10 (2, 27)      |
| <b>Second hand smoking (%)<sup>a</sup></b>                    | 307 (61.7)        | 324 (42.6)   | 210 (48.2)    | 312 (61.5)   | 326 (48.9)  | 222 (28.9)      |
| <b>Gas exposure (%)</b>                                       | 126 (25.3)        | 145 (19.0)   | 101 (23.2)    | 159 (31.4)   | 73 (11.0)   | 78 (10.2)       |
| <b>Fume exposure (%)</b>                                      | 174 (34.9)        | 186 (24.4)   | 148 (34.1)    | 183 (36.1)   | 71 (10.7)   | 92 (11.9)       |
| <b>Current employment at baseline (%)</b>                     | 341 (68.5)        | 435 (57.2)   | 274 (63.1)    | 375 (73.9)   | 458 (68.8)  | 384 (49.9)      |
| <b>BMI&lt;30kg/m<sup>2</sup>(%)</b>                           | 299 (60.1)        | 511 (67.1)   | 261 (60.0)    | 294 (57.9)   | 547 (82.2)  | 593 (77.1)      |
| <b>Air pollution at baseline<sup>b</sup></b>                  |                   |              |               |              |             |                 |
| O <sub>3</sub> (ppb)                                          | 26.3(2.5)         | 15.7(2.6)    | 22.9(1.9)     | 22.3(1.6)    | 22.3(2.1)   | 19.8(2.5)       |
| PM <sub>2.5</sub> (µg/m <sup>3</sup> )                        | 14.2(0.4)         | 14.6(2.2)    | 14.6(1)       | 9.8(0.9)     | 14.3(1.3)   | 16.9(1.4)       |
| NO <sub>x</sub> (ppb)                                         | 15.2(5.4)         | 64.1(20.4)   | 30.1(10.1)    | 21.8(5.3)    | 34.6(7.3)   | 54.3(13.8)      |
| Black carbon (µg/m <sup>3</sup> )                             | 0.5(0.1)          | 1.2(0.3)     | 0.7(0.2)      | 0.4(0.1)     | 0.6(0.1)    | 1.2(0.1)        |
| <b>Air pollution over follow-up<sup>c</sup></b>               |                   |              |               |              |             |                 |
| O <sub>3</sub> (ppb)                                          | 27.3(2.3)         | 17.8(2.6)    | 24.7(1.8)     | 22.7(1.4)    | 23.4(1.8)   | 20.4(2.7)       |
| PM <sub>2.5</sub> (µg/m <sup>3</sup> )                        | 11.5(1.1)         | 12.5(2)      | 11.2(1.1)     | 9.4(0.6)     | 12.2(1.1)   | 13.7(1.6)       |
| NO <sub>x</sub> (ppb)                                         | 10.9(3.8)         | 50.0(17.2)   | 21.3(7.4)     | 17.1(3.9)    | 26.3(6.3)   | 42.4(11)        |

|                                |                   |                   |                   |                   |                   |                   |
|--------------------------------|-------------------|-------------------|-------------------|-------------------|-------------------|-------------------|
| <b>FEV<sub>1</sub> (mL)</b>    |                   |                   |                   |                   |                   |                   |
| Baseline                       | 2463.2<br>(675.9) | 2413.9<br>(742.3) | 2435.2<br>(672.8) | 2731.9<br>(745.3) | 2430.8<br>(736.7) | 2424.3<br>(724.9) |
| Change/year                    | -<br>25.3(36.9)   | -<br>32.3(31.5)   | -<br>34.1(38.9)   | -37.2(31)         | -26(30.2)         | -<br>36.1(36.9)   |
| <b>FVC (mL)</b>                |                   |                   |                   |                   |                   |                   |
| Baseline                       | 3306.2<br>(895.8) | 3229.1<br>(994.7) | 3267.7<br>(939.4) | 3660.9<br>(969.8) | 3247.9<br>(963.3) | 3179.9<br>(918.2) |
| Change/year                    | -<br>24.4(49.6)   | -40(48.8)         | -<br>34.6(57.4)   | -45.9(42)         | -<br>23.6(41.9)   | -<br>35.3(38.3)   |
| <b>FEV<sub>1</sub>/FVC (%)</b> |                   |                   |                   |                   |                   |                   |
| Baseline                       | 74.7 (7.7)        | 75.2 (8.0)        | 75.4 (9.5)        | 74.8 (7.7)        | 76.5 (7.7)        | 76.5 (7.7)        |
| Change/year                    | -0.2(0.8)         | -0.1(0.7)         | -0.3(1.4)         | -0.1(0.7)         | -0.3(0.7)         | -0.3(1.1)         |

<sup>a</sup>Second hand smoking was determined as participants including never and ever smokers, who contacted other people smoking at home, in car or work in the past year.

<sup>b</sup>Baseline exposures were assessed as pollutant concentration for the year of the baseline exam in 2004-07 or for the years of 2006-08 (for black carbon).

<sup>c</sup>Exposure over follow-up was the mean exposures for each participant aggregated from the year of the baseline exam to that of the follow-up clinic exam within the years from 2004 to 2018.

**eTable 3 Pearson correlation coefficients between predicted air pollution exposures at the MESA participants' homes within the MESA cities (N=6860)**

|                                               | O <sub>3</sub> | PM <sub>2.5</sub> | NO <sub>x</sub> | Black carbon <sup>a</sup> |
|-----------------------------------------------|----------------|-------------------|-----------------|---------------------------|
| <b>Exposure at baseline</b>                   |                |                   |                 |                           |
| O <sub>3</sub>                                | 1              | -0.36             | -0.42           | -0.29                     |
| PM <sub>2.5</sub>                             | -0.36          | 1                 | 0.62            | 0.43                      |
| NO <sub>x</sub>                               | -0.42          | 0.62              | 1               | 0.61                      |
| Black carbon                                  | -0.29          | 0.43              | 0.61            | 1                         |
| <b>Exposure over follow-up</b>                |                |                   |                 |                           |
| O <sub>3</sub>                                | 1              | -0.32             | -0.42           | -                         |
| PM <sub>2.5</sub>                             | -0.32          | 1                 | 0.69            | -                         |
| NO <sub>x</sub>                               | -0.42          | 0.69              | 1               | -                         |
| <b>Exposure at baseline vs over follow-up</b> | 0.78           | 0.53              | 0.82            | -                         |

<sup>a</sup>Average concentration between 2006-08.

**eTable 4 Main and sensitivity analyses of effect estimates (95% CIs) of air pollution concentrations, assessed at baseline in 2000, with longitudinal changes of percent emphysema on CT, per 10 years from staged models.**

| Model | Description                             | Number of participants | O <sub>3</sub><br>(3 ppb) | PM <sub>2.5</sub><br>(2 µg/m <sup>3</sup> ) | NO <sub>x</sub><br>(10 ppb) | Black carbon<br>(0.2 µg/m <sup>3</sup> ) <sup>a</sup> |
|-------|-----------------------------------------|------------------------|---------------------------|---------------------------------------------|-----------------------------|-------------------------------------------------------|
|       | <i>Main analysis</i>                    |                        |                           |                                             |                             |                                                       |
| 1     | Base                                    | 6860                   | 0.12 (0.02, 0.23)         | 0.13 (0.05, 0.21)                           | 0.08 (0.03, 0.14)           | 0.12 (0.03, 0.21)                                     |
| 2     | Primary                                 | 6860                   | 0.13 (0.03, 0.24)         | 0.11 (0.03, 0.19)                           | 0.06 (0.01, 0.12)           | 0.10 (0.01, 0.18)                                     |
| 3     | Extended                                | 6860                   | 0.14 (0.03, 0.24)         | 0.11 (0.03, 0.18)                           | 0.05 (0.00, 0.10)           | 0.07 (-0.02, 0.15)                                    |
|       | <i>Sensitivity analysis</i>             |                        |                           |                                             |                             |                                                       |
| 4     | Adjust for all the other pollutants     | 6860                   | 0.23 (0.10, 0.36)         | 0.08 (0.01, 0.15)                           | 0.05 (-0.04, 0.13)          | 0.05 (-0.07, 0.17)                                    |
| 5     | Log-transformed outcome <sup>b</sup>    | 6860                   | 4.27 (0.58, 8.08)         | 2.67 (0.06, 5.34)                           | 2.48 (0.63, 4.37)           | 2.13 (0.00, 4.26)                                     |
| 6     | Exclude low volume CT scan <sup>c</sup> | 5759                   | 0.13 (0.02, 0.23)         | 0.09 (0.01, 0.17)                           | 0.06 (0.01, 0.12)           | 0.06 (-0.03, 0.15)                                    |
| 7     | Include spatial cluster                 | 6860                   | 0.12 (0.01, 0.23)         | 0.11 (0.03, 0.20)                           | 0.07 (0.01, 0.12)           | 0.10 (0.01, 0.19)                                     |
| 8     | HMMF as outcome <sup>d</sup>            | 4231                   | 0.12 (0.02, 0.22)         | -0.01 (-0.12, 0.11)                         | 0.01 (-0.07, 0.09)          | 0.11 (-0.02, 0.23)                                    |
| 9     | PD15 as outcome <sup>e</sup>            | 6861                   | -0.64 (-1.27, -0.01)      | -0.29 (-0.57, -0.01)                        | -0.10 (-0.44, 0.23)         | -0.23 (-0.78, 0.32)                                   |
| 10    | Exclude single exam subjects            | 5780                   | 0.14 (0.03, 0.25)         | 0.10 (0.02, 0.18)                           | 0.06 (0.00, 0.11)           | 0.09 (0.00, 0.18)                                     |
| 11    | Subjects with lung function             | 3636                   | 0.15 (0.03, 0.28)         | 0.13 (0.04, 0.22)                           | 0.08 (0.01, 0.14)           | 0.09 (-0.01, 0.19)                                    |

Model 1 adjusted for baseline age, gender, race, study region and air pollutant and time-varying height, weight, CT scanners, pixel size, milliamperes (mAs);

Model 2 (primary model)= Model 1 + physical activity, income, employment status, NSES index, and NSES\*study region, time varying smoking status, second hand smoking, pack years, cigarettes per day, BMI, education, temperature;

Model 3 = Model 2 + high-attenuation areas on CT;

Model 4 = Model 2 + all the other pollutants (i.e. O<sub>3</sub>, NO<sub>x</sub>, PM<sub>2.5</sub>, Black carbon);

Model 5 = Same as Model 2;

Model 6 = Same as Model 2 without low lung volume CT-scans;

Model 7 = Same as Model 2 with additional random effect accounting for census tract;

Model 8-9 = Same as Model 2 with different outcomes;

Model 10 = Same as Model 2 without subjects with single examination;

Model 11 = Same as Model 2 with subset present in both cohorts;

<sup>a</sup>Average concentration between 2006-08.

<sup>b</sup>Log-transformed percent emphysema (-950HU). Results interpret as percent increase in percent emphysema over ten years.

<sup>c</sup>Exclude low volume CT scan: we excluded scans with inspiratory levels less than 80% of the subject's maximum lung volume on scans.

<sup>d</sup>a novel approach to the measurement of percent emphysema uses a hidden modified Markov field (HMMF). For more details please see the method section.

<sup>e</sup>PD15 unit is g/L; A lower PD15 value indicates more emphysema.



**eTable 5 Main and sensitivity analyses of effect estimates (95% CIs) of long-term air pollution concentrations, assessed during follow-up, with longitudinal change of percent emphysema on CT over 10 years from staged models.**

| Model | Description                             | Number of participants | O <sub>3</sub><br>(3 ppb) | PM <sub>2.5</sub><br>(2 µg/m <sup>3</sup> ) | NO <sub>x</sub><br>(10 ppb) |
|-------|-----------------------------------------|------------------------|---------------------------|---------------------------------------------|-----------------------------|
|       | <i>Main analysis</i>                    |                        |                           |                                             |                             |
| 1     | Base                                    | 6860                   | 0.19 (0.09, 0.29)         | 0.02 (-0.10, 0.14)                          | 0.14 (0.07, 0.22)           |
| 2     | Primary                                 | 6860                   | 0.18 (0.08, 0.28)         | -0.04 (-0.15, 0.08)                         | 0.12 (0.04, 0.19)           |
| 3     | Extended                                | 6860                   | 0.18 (0.08, 0.28)         | -0.04 (-0.16, 0.07)                         | 0.10 (0.03, 0.18)           |
|       | <i>Sensitivity analysis</i>             |                        |                           |                                             |                             |
| 4     | Adjust for all the other pollutants     | 6860                   | 0.21 (0.10, 0.32)         | -0.24 (-0.50, 0.02)                         | 0.29 (0.18, 0.40)           |
| 5     | Log-transformed outcome <sup>a</sup>    | 6860                   | 6.83 (3.28, 10.51)        | -1.90 (-5.56, 1.91)                         | 11.12 (2.65, 20.27)         |
| 6     | Exclude low volume CT scan <sup>b</sup> | 5759                   | 0.21 (0.10, 0.31)         | -0.04 (-0.16, 0.07)                         | 0.12 (0.04, 0.20)           |
| 7     | Include spatial cluster                 | 6860                   | 0.18 (0.07, 0.28)         | -0.05 (-0.17, 0.07)                         | 0.14 (0.06, 0.22)           |
| 8     | HMMF as outcome <sup>c</sup>            | 4231                   | 0.15 (0.00, 0.30)         | -0.08 (-0.23, 0.08)                         | -0.01 (-0.11, 0.09)         |
| 9     | PD15 as outcome <sup>d</sup>            | 6861                   | -0.74 (-1.43, -0.05)      | 0.67 (-0.21, 1.55)                          | -0.42 (-0.81, -0.03)        |
| 10    | Exclude single exam subjects            | 5780                   | 0.19 (0.09, 0.29)         | -0.05 (-0.16, 0.07)                         | 0.10 (0.02, 0.18)           |
| 11    | Subjects with lung function             | 3636                   | 0.20 (0.09, 0.32)         | 0.00 (-0.14, 0.13)                          | 0.11 (0.02, 0.20)           |

Model 1 adjusted for baseline age, gender, race, study region and air pollutant and time-varying height, weight, CT scanners, pixel size, milliamperes (mAs);

Model 2 (primary model) = Model 1 + physical activity, income, employment status, NSES index, and NSES\*study region, time varying smoking status, second hand smoking, pack years, cigarettes per day, BMI, education, temperature;

Model 3 = Model 2 + high-attenuation areas on CT;

Model 4 = Model 2 + all the other pollutants (i.e. O<sub>3</sub>, NO<sub>x</sub>, PM<sub>2.5</sub>);

Model 5 = Same as Model 2;

Model 6 = Same as Model 2 without low lung volume CT-scans;

Model 7 = Same as Model 2 with additional random effect accounting for census tract;

Model 8-9 = Same as Model 2 with different outcomes;

Model 10 = Same as Model 2 without subjects with single examination;

Model 11 = Same as Model 2 with subset present in both cohorts;

<sup>a</sup>Log-transformed percent emphysema (-950HU). Results interpret as percent increase in percent emphysema over ten years.

<sup>b</sup>Exclude low volume CT scan: we excluded scans with inspiratory levels less than 80% of the subject's maximum lung volume on scans.

<sup>c</sup>a novel approach to the measurement of percent emphysema uses a hidden modified Markov field (HMMF). For more details please see the method section.

<sup>d</sup>PD15 unit is g/L; A lower PD15 value indicates more emphysema.

**eTable 6 Effect estimates (95% CIs) for the associations between air pollutant exposures at baseline or over follow-up and progression of percent emphysema in single-pollutant, multiple-pollutant and linear combination models, per IQR increment for O<sub>3</sub> (3 ppb), PM<sub>2.5</sub> (2 µg/m<sup>3</sup>), NO<sub>x</sub> (10 ppb) and black carbon (BC; 0.2 µg/m<sup>3</sup>).**

| Health models                                          | Exposure at baseline <sup>a</sup> | Exposure over follow-up <sup>b</sup> |
|--------------------------------------------------------|-----------------------------------|--------------------------------------|
| Single-pollutant model <sup>c</sup>                    |                                   |                                      |
| O <sub>3</sub>                                         | 0.13 (0.03, 0.24)                 | 0.18 (0.08, 0.28)                    |
| PM <sub>2.5</sub>                                      | 0.11 (0.03, 0.19)                 | -0.04 (-0.15, 0.08)                  |
| NO <sub>x</sub>                                        | 0.06 (0.01, 0.12)                 | 0.12 (0.04, 0.19)                    |
| BC                                                     | 0.10 (0.01, 0.18)                 |                                      |
| Multiple-pollutant model <sup>d</sup>                  |                                   |                                      |
| O <sub>3</sub>                                         | 0.23 (0.10, 0.36)                 | 0.21 (0.10, 0.32)                    |
| PM <sub>2.5</sub>                                      | 0.08 (0.01, 0.15)                 | -0.24 (-0.50, 0.02)                  |
| NO <sub>x</sub>                                        | 0.05 (-0.04, 0.13)                | 0.29 (0.18, 0.4)                     |
| BC                                                     | 0.05 (-0.07, 0.17)                |                                      |
| Linear combination model <sup>e</sup>                  |                                   |                                      |
| O <sub>3</sub> +PM <sub>2.5</sub> +NO <sub>x</sub> +BC | 0.41 (0.20, 0.62)                 |                                      |
| O <sub>3</sub> +PM <sub>2.5</sub> +NO <sub>x</sub>     | 0.36 (0.17, 0.55)                 | 0.25 (0.06, 0.44)                    |
| O <sub>3</sub> + PM <sub>2.5</sub> +BC                 | 0.36 (0.14, 0.58)                 |                                      |
| O <sub>3</sub> + NO <sub>x</sub> +BC                   | 0.33 (0.14, 0.52)                 |                                      |
| PM <sub>2.5</sub> + NO <sub>x</sub> +BC                | 0.18 (0.05, 0.30)                 |                                      |
| O <sub>3</sub> + PM <sub>2.5</sub>                     | 0.31 (0.13, 0.49)                 | -0.03 (-0.23, 0.17)                  |
| O <sub>3</sub> + NO <sub>x</sub>                       | 0.28 (0.11, 0.45)                 | 0.50 (0.32, 0.67)                    |
| O <sub>3</sub> +BC                                     | 0.28 (0.10, 0.47)                 |                                      |
| PM <sub>2.5</sub> + NO <sub>x</sub>                    | 0.13 (0.02, 0.23)                 | 0.04 (-0.08, 0.17)                   |
| PM <sub>2.5</sub> +BC                                  | 0.13 (-0.03, 0.29)                |                                      |
| NO <sub>x</sub> +BC                                    | 0.10 (-0.01, 0.21)                |                                      |

<sup>a</sup>Baseline air pollution exposures were calculated in 2000 or for the years of 2006-08 (for black carbon) in 18902 samples

<sup>b</sup>Follow-up air pollution exposures were aggregated from the year of the baseline exam to that of the follow-up clinic exam from 2000 to 2018 in 18574 samples

<sup>c</sup>Results of single-pollutant model derived from main analyses for the associations between each of the air pollutants and progression of percent emphysema (percentage of lung pixels less than -950 Hounsfield unit).

<sup>d</sup>Multi-pollutant model presented the associations of the fully-adjusted model when all the air pollutants were modelled simultaneously.

<sup>e</sup>Linear combination models were implemented by combining the associations from any pairs of the air pollutants, based on associations from the multi-pollutant model which included all the pollutants simultaneously.

**eTable 7 Longitudinal changes in percent emphysema (95% CI) per over ten years per increase of O<sub>3</sub>, PM<sub>2.5</sub>, NO<sub>x</sub> and black carbon, assessed at baseline between 2000 and 2007, stratified by potential effect modifiers**

| Effect modification              | N    | O <sub>3</sub><br>(3 ppb) | P-value <sup>a</sup> | PM <sub>2.5</sub><br>(2 µg/m <sup>3</sup> ) | P-value <sup>a</sup> | NO <sub>x</sub><br>(10 ppb) | P-value <sup>a</sup> | Black carbon<br>(0.2 µg/m <sup>3</sup> ) <sup>b</sup> | P-value <sup>a</sup> |
|----------------------------------|------|---------------------------|----------------------|---------------------------------------------|----------------------|-----------------------------|----------------------|-------------------------------------------------------|----------------------|
| Gender                           |      |                           | <0.01                |                                             | <0.01                |                             | <0.01                |                                                       | <0.01                |
| Male                             | 3224 | 0.27 (0.16, 0.38)         |                      | 0.07 (-0.02, 0.15)                          |                      | -0.02 (-0.08, 0.04)         |                      | -0.03 (-0.12, 0.07)                                   |                      |
| Female                           | 3636 | 0.01 (-0.10, 0.13)        |                      | 0.17 (0.08, 0.25)                           |                      | 0.13 (0.07, 0.18)           |                      | 0.18 (0.08, 0.27)                                     |                      |
| Baseline age                     |      |                           | 0.31                 |                                             | 0.19                 |                             | 0.15                 |                                                       | 0.50                 |
| <65                              | 3859 | 0.16 (0.05, 0.27)         |                      | 0.09 (0.00, 0.17)                           |                      | 0.05 (0.00, 0.11)           |                      | 0.08 (-0.01, 0.17)                                    |                      |
| ≥65                              | 3001 | 0.12 (-0.01, 0.24)        |                      | 0.13 (0.05, 0.22)                           |                      | 0.09 (0.02, 0.16)           |                      | 0.11 (0.01, 0.21)                                     |                      |
| Race                             |      |                           | 0.02                 |                                             | 0.04                 |                             | 0.00                 |                                                       | <0.01                |
| White                            | 2707 | 0.23 (0.11, 0.35)         |                      | 0.00 (-0.11, 0.11)                          |                      | -0.03 (-0.10, 0.04)         |                      | -0.08 (-0.19, 0.03)                                   |                      |
| Chinese                          | 784  | 0.14 (-0.11, 0.39)        |                      | 0.15 (0.04, 0.25)                           |                      | 0.18 (0.07, 0.29)           |                      | 0.21 (0.00, 0.41)                                     |                      |
| Black                            | 1879 | 0.07 (-0.06, 0.20)        |                      | 0.19 (0.07, 0.32)                           |                      | 0.10 (0.03, 0.18)           |                      | 0.15 (0.05, 0.25)                                     |                      |
| Hispanic                         | 1490 | 0.06 (-0.10, 0.21)        |                      | 0.10 (0.01, 0.20)                           |                      | 0.07 (0.00, 0.13)           |                      | 0.11 (0.00, 0.22)                                     |                      |
| Smoking status                   |      |                           | 0.01                 |                                             | 0.16                 |                             | 0.43                 |                                                       | 0.76                 |
| Never                            | 3113 | 0.17 (0.05, 0.28)         |                      | 0.10 (0.02, 0.18)                           |                      | 0.06 (0.00, 0.12)           |                      | 0.09 (0.00, 0.19)                                     |                      |
| Former                           | 2799 | 0.16 (0.05, 0.28)         |                      | 0.12 (0.03, 0.21)                           |                      | 0.06 (0.00, 0.12)           |                      | 0.08 (-0.02, 0.18)                                    |                      |
| Current                          | 948  | -0.08 (-0.26, 0.09)       |                      | 0.23 (0.09, 0.37)                           |                      | 0.12 (0.02, 0.22)           |                      | 0.14 (-0.01, 0.29)                                    |                      |
| BMI                              |      |                           | 0.41                 |                                             | 0.08                 |                             | 0.04                 |                                                       | 0.27                 |
| < 30                             | 4621 | 0.12 (-0.01, 0.25)        |                      | 0.16 (0.07, 0.25)                           |                      | 0.11 (0.04, 0.17)           |                      | 0.12 (0.02, 0.23)                                     |                      |
| ≥ 30                             | 2239 | 0.16 (0.05, 0.27)         |                      | 0.10 (0.01, 0.18)                           |                      | 0.05 (-0.01, 0.10)          |                      | 0.08 (-0.01, 0.17)                                    |                      |
| Airflow obstruction <sup>c</sup> |      |                           | 0.04                 |                                             | 0.04                 |                             | 0.03                 |                                                       | 0.01                 |
| No                               | 2818 | 0.12 (0.00, 0.25)         |                      | 0.10 (0.01, 0.20)                           |                      | 0.09 (0.02, 0.15)           |                      | 0.12 (0.02, 0.23)                                     |                      |
| Yes                              | 818  | 0.25 (0.09, 0.41)         |                      | 0.21 (0.09, 0.33)                           |                      | 0.00 (-0.09, 0.09)          |                      | -0.01 (-0.14, 0.11)                                   |                      |
| NSES disadvantage <sup>d</sup>   |      |                           | <0.01                |                                             | 0.03                 |                             | 0.01                 |                                                       | 0.00                 |

|                      |      |                     |      |                    |      |                     |      |                     |      |
|----------------------|------|---------------------|------|--------------------|------|---------------------|------|---------------------|------|
| Yes                  | 3473 | 0.08 (-0.04, 0.21)  |      | 0.13 (0.05, 0.22)  |      | 0.08 (0.02, 0.13)   |      | 0.11 (0.02, 0.20)   |      |
| No                   | 3387 | 0.21 (0.10, 0.32)   |      | 0.06 (-0.03, 0.14) |      | 0.00 (-0.06, 0.07)  |      | -0.01 (-0.11, 0.09) |      |
| Study regions        |      |                     | 0.24 |                    | 0.53 |                     | 0.65 |                     | 0.76 |
| Winston-Salem, NC    | 1037 | 0.23 (0.05, 0.42)   |      | 0.14 (-0.27, 0.56) |      | 0.05 (-0.23, 0.33)  |      | 0.16 (-0.44, 0.76)  |      |
| New York, NY         | 1182 | -0.06 (-0.37, 0.25) |      | 0.31 (0.11, 0.51)  |      | 0.08 (-0.01, 0.17)  |      | 0.12 (0.02, 0.22)   |      |
| Baltimore, MD        | 1054 | 0.05 (-0.18, 0.27)  |      | 0.11 (-0.17, 0.40) |      | -0.03 (-0.16, 0.11) |      | -0.05 (-0.26, 0.17) |      |
| St. Paul, MN         | 1021 | 0.34 (-0.01, 0.69)  |      | 0.05 (-0.19, 0.3)  |      | 0.00 (-0.27, 0.26)  |      | 0.10 (-0.42, 0.62)  |      |
| Chicago, IL          | 1142 | 0.21 (-0.05, 0.48)  |      | 0.12 (-0.05, 0.29) |      | 0.14 (-0.02, 0.30)  |      | 0.21 (-0.17, 0.59)  |      |
| Los Angeles, CA      | 1424 | 0.01 (-0.21, 0.23)  |      | 0.09 (-0.01, 0.19) |      | 0.09 (0.00, 0.18)   |      | 0.16 (-0.17, 0.49)  |      |
| Scanner manufacturer |      |                     | 0.22 |                    | 0.15 |                     | 0.43 |                     | 0.33 |
| GE                   | 4679 | 0.12 (-0.07, 0.31)  |      | 0.08 (-0.13, 0.30) |      | 0.05 (-0.01, 0.11)  |      | 0.08 (-0.02, 0.18)  |      |
| Siemens              | 2181 | 0.07 (-0.05, 0.20)  |      | 0.17 (-0.02, 0.37) |      | 0.08 (0.00, 0.17)   |      | 0.11 (-0.01, 0.24)  |      |

All models adjust for age, gender, race, baseline O<sub>3</sub> or PM<sub>2.5</sub>, physical activity, income, employment status, education, SES index, study region and SES\*study region, height, weight, temperature, smoking status, second hand smoking, pack years, cigarettes per day, BMI, interactions of these variables with time, CT scanners, pixel size;

<sup>a</sup>P-value for the F-test of the three-way interaction between air pollutant, follow-up time, and stratification variable;

<sup>b</sup>Average concentration between 2006-08.

<sup>c</sup>Presence of airflow obstruction for FEV<sub>1</sub> and FVC is defined as a pre-bronchodilator FEV<sub>1</sub>/FVC ratio less than 0.7;

<sup>d</sup>Neighborhood Socio-economic Status (NSES) index was constructed by factor analysis of indicators of neighborhood-level SES (wealth, income, education, employment and occupation). It was included as continuous variable (range: -24 to 11) with higher value indicating more socioeconomic disadvantage. A cut-off point at 0 was considered in the analysis of the effect modification.

**eTable 8 Longitudinal changes in percent emphysema (95% CI) over ten years per increase of long-term O<sub>3</sub>, PM<sub>2.5</sub> and NO<sub>x</sub> concentration, assessed during following, stratified by potential effect modifiers**

| Effect modification              | N    | O <sub>3</sub><br>(3 ppb) | P-value <sup>a</sup> | PM <sub>2.5</sub><br>(2 µg/m <sup>3</sup> ) | P-value <sup>a</sup> | NO <sub>x</sub><br>(10 ppb) | P-value <sup>a</sup> |
|----------------------------------|------|---------------------------|----------------------|---------------------------------------------|----------------------|-----------------------------|----------------------|
| Gender                           |      |                           | <0.01                |                                             | <0.01                |                             | <0.01                |
| Male                             | 3224 | 0.31 (0.20, 0.43)         |                      | -0.15 (-0.28, -0.02)                        |                      | 0.00 (-0.09, 0.09)          |                      |
| Female                           | 3636 | 0.06 (-0.05, 0.17)        |                      | 0.06 (-0.07, 0.19)                          |                      | 0.21 (0.12, 0.29)           |                      |
| Baseline age                     |      |                           | 0.85                 |                                             | 0.14                 |                             | 0.52                 |
| <65                              | 3859 | 0.18 (0.07, 0.29)         |                      | -0.07 (-0.19, 0.05)                         |                      | 0.11 (0.03, 0.19)           |                      |
| ≥65                              | 3001 | 0.19 (0.06, 0.32)         |                      | 0.02 (-0.12, 0.17)                          |                      | 0.13 (0.04, 0.23)           |                      |
| Race                             |      |                           | 0.05                 |                                             | 0.63                 |                             | 0.06                 |
| White                            | 2707 | 0.27 (0.15, 0.39)         |                      | -0.06 (-0.21, 0.10)                         |                      | 0.04 (-0.06, 0.14)          |                      |
| Chinese                          | 784  | 0.21 (-0.06, 0.47)        |                      | -0.09 (-0.27, 0.09)                         |                      | 0.19 (0.02, 0.35)           |                      |
| Black                            | 1879 | 0.10 (-0.04, 0.24)        |                      | 0.05 (-0.14, 0.23)                          |                      | 0.18 (0.07, 0.28)           |                      |
| Hispanic                         | 1490 | 0.06 (-0.11, 0.23)        |                      | -0.02 (-0.17, 0.13)                         |                      | 0.11 (0.02, 0.21)           |                      |
| Smoking status                   |      |                           | 0.22                 |                                             | 0.66                 |                             | 0.82                 |
| Never                            | 3113 | 0.16 (0.04, 0.28)         |                      | -0.03 (-0.16, 0.09)                         |                      | 0.11 (0.02, 0.19)           |                      |
| Former                           | 2799 | 0.22 (0.10, 0.33)         |                      | -0.05 (-0.19, 0.08)                         |                      | 0.12 (0.03, 0.21)           |                      |
| Current                          | 948  | 0.03 (-0.19, 0.26)        |                      | 0.04 (-0.18, 0.26)                          |                      | 0.15 (0.01, 0.30)           |                      |
| BMI                              |      |                           | 0.10                 |                                             | 0.45                 |                             | 0.71                 |
| < 30                             | 4621 | 0.22 (0.11, 0.33)         |                      | -0.02 (-0.15, 0.10)                         |                      | 0.12 (0.03, 0.20)           |                      |
| ≥ 30                             | 2239 | 0.12 (0.00, 0.25)         |                      | -0.07 (-0.22, 0.07)                         |                      | 0.10 (0.01, 0.19)           |                      |
| Airflow obstruction <sup>b</sup> |      |                           | 0.01                 |                                             | 0.07                 |                             | 0.24                 |
| No                               | 2818 | 0.15 (0.03, 0.27)         |                      | -0.04 (-0.18, 0.09)                         |                      | 0.12 (0.03, 0.21)           |                      |
| Yes                              | 818  | 0.35 (0.18, 0.51)         |                      | 0.12 (-0.07, 0.31)                          |                      | 0.06 (-0.07, 0.18)          |                      |
| NSES disadvantage <sup>c</sup>   |      |                           | 0.03                 |                                             | 0.74                 |                             | 0.22                 |
| Yes                              | 3473 | 0.12 (-0.01, 0.24)        |                      | -0.05 (-0.18, 0.08)                         |                      | 0.12 (0.04, 0.21)           |                      |
| No                               | 3387 | 0.25 (0.14, 0.36)         |                      | -0.07 (-0.20, 0.06)                         |                      | 0.07 (-0.02, 0.17)          |                      |
| Study regions                    |      |                           | 0.08                 |                                             | 0.05                 |                             | 0.04                 |
| Winston-Salem, NC                | 1037 | 0.33 (0.08, 0.58)         |                      | -1.15 (-2.29, -0.01)                        |                      | -0.41 (-0.85, 0.03)         |                      |
| New York, NY                     | 1182 | 0.20 (-0.06, 0.46)        |                      | -0.01 (-0.22, 0.21)                         |                      | 0.08 (-0.03, 0.19)          |                      |
| Baltimore, MD                    | 1054 | 0.11 (-0.10, 0.31)        |                      | 0.35 (0.07, 0.63)                           |                      | 0.12 (-0.07, 0.31)          |                      |
| St. Paul, MN                     | 1021 | 0.42 (0.06, 0.78)         |                      | -0.75 (-1.46, -0.04)                        |                      | -0.20 (-0.60, 0.20)         |                      |
| Chicago, IL                      | 1142 | -0.12 (-0.37, 0.12)       |                      | 0.82 (0.57, 1.07)                           |                      | 0.71 (0.50, 0.91)           |                      |
| Los Angeles, CA                  | 1424 | 0.19 (-0.02, 0.40)        |                      | -0.27 (-0.56, 0.03)                         |                      | 0.01 (-0.12, 0.15)          |                      |
| Scanner manufacturer             |      |                           | 0.63                 |                                             | 0.15                 |                             | 0.09                 |
| GE                               | 4679 | 0.12 (0.03, 0.21)         |                      | 0.04 (-0.17, 0.26)                          |                      | 0.05 (-0.07, 0.17)          |                      |

|         |      |                    |  |                    |  |                   |
|---------|------|--------------------|--|--------------------|--|-------------------|
| Siemens | 2181 | 0.11 (-0.02, 0.23) |  | 0.09 (-0.09, 0.28) |  | 0.13 (0.01, 0.26) |
|---------|------|--------------------|--|--------------------|--|-------------------|

All models adjust for age, gender, race, baseline O<sub>3</sub> or PM<sub>2.5</sub>, physical activity, income, employment status, education, SES index, study region and SES\*study region, height, weight, temperature, smoking status, second hand smoking, pack years, cigarettes per day, BMI, interactions of these variables with time, CT scanners, pixel size;

<sup>a</sup>P-value for the F-test of the three-way interaction between air pollutant, follow-up time, and stratification variable;

<sup>b</sup>Presence of airflow obstruction for FEV<sub>1</sub> and FVC is defined as a pre-bronchodilator FEV<sub>1</sub>/FVC ratio less than 0.7;

<sup>c</sup>Neighborhood Socio-Economic Status (NSES) index was constructed by factor analysis of indicators of neighborhood-level SES (wealth, income, education, employment and occupation). It was included as continuous variable (range: -24 to 11) with higher value indicating more socioeconomic disadvantage. A cut-off point at 0 was considered in the analysis of the effect modification.

**eTable 9 Multiplicative interactions between air pollutant exposures for effect of air pollution on progression of percent emphysema over ten years (N=6860)**

| Multiplicative Interaction <sup>a</sup> | Exposure at baseline | P-value | Exposure over follow-up | P-value |
|-----------------------------------------|----------------------|---------|-------------------------|---------|
| O <sub>3</sub> * PM <sub>2.5</sub>      | 0.00 (-0.04, 0.05)   | 0.86    | -0.02 (-0.08, 0.04)     | 0.52    |
| O <sub>3</sub> * NO <sub>x</sub>        | -0.01 (-0.04, 0.02)  | 0.43    | 0.02 (-0.02, 0.05)      | 0.37    |
| O <sub>3</sub> *Black carbon            | -0.04 (-0.10, 0.02)  | 0.16    | -                       | -       |
| PM <sub>2.5</sub> *NO <sub>x</sub>      | 0.01 (-0.01, 0.03)   | 0.32    | -0.03 (-0.06, 0.01)     | 0.10    |
| PM <sub>2.5</sub> *Black carbon         | 0.03 (-0.01, 0.08)   | 0.17    | -                       | -       |
| NO <sub>x</sub> *Black carbon           | 0.02 (0.00, 0.04)    | 0.05    | -                       | -       |

<sup>a</sup>changes over ten years per 3 ppb increase of O<sub>3</sub>, 2 µg/m<sup>3</sup> of PM<sub>2.5</sub>, 10ppb of NO<sub>x</sub> and 0.2 µg/m<sup>3</sup> of black carbon. Black carbon: average concentration between 2006-08.

**eTable 10 Main and sensitivity analyses of effect estimates (95% CIs) of long-term air pollution concentrations, assessed during following with longitudinal changes of lung function over 10 years from staged models**

| Model                          | Description      | N    | O <sub>3</sub><br>(3 ppb) | PM <sub>2.5</sub><br>(2 µg/m <sup>3</sup> ) | NOx<br>(10 ppb)       |
|--------------------------------|------------------|------|---------------------------|---------------------------------------------|-----------------------|
| <b>FEV<sub>1</sub> (ml)</b>    |                  |      |                           |                                             |                       |
| 1                              | Base             | 3636 | -17.04 (-32.96, -1.12)    | 11.22 (-5.5, 27.94)                         | 1.84 (-10.08, 13.75)  |
| 2                              | Primary          | 3636 | -18.15 (-34.71, -1.59)    | 12.82 (-4.98, 30.63)                        | 2.88 (-10.08, 15.84)  |
| 3                              | Extended         | 3631 | -17.53 (-34.11, -0.95)    | 12.31 (-5.47, 30.10)                        | 3.27 (-9.69, 16.22)   |
| 4                              | Multi -pollutant | 3636 | -15.95 (-31.29, -0.60)    | 18.66 (-6.64, 43.95)                        | -7.46 (-26.12, 11.20) |
| <b>FVC (ml)</b>                |                  |      |                           |                                             |                       |
| 1                              | Base             | 3636 | -37.38 (-58.94, -15.81)   | 10.36 (-11.94, 32.66)                       | -0.29 (-16.2, 15.63)  |
| 2                              | Primary          | 3636 | -40.19 (-62.49, -17.88)   | 17.80 (-5.95, 41.56)                        | 3.46 (-13.87, 20.79)  |
| 3                              | Extended         | 3631 | -37.86 (-60.20, -15.51)   | 17.61 (-6.18, 41.39)                        | 3.51 (-13.85, 20.87)  |
| 4                              | Multi -pollutant | 3636 | -31.44 (-57.86, -5.02)    | 25.42 (-3.78, 54.62)                        | -16.94 (-35.26, 1.37) |
| <b>FEV<sub>1</sub>/FVC (%)</b> |                  |      |                           |                                             |                       |
| 1                              | Base             | 3636 | 0.27 (-0.27, 0.82)        | 0.11 (-0.26, 0.49)                          | 0.09 (-0.20, 0.36)    |
| 2                              | Primary          | 3636 | 0.31 (-0.27, 0.88)        | 0.03 (-0.38, 0.44)                          | 0.06 (-0.20, 0.36)    |
| 3                              | Extended         | 3631 | 0.29 (-0.27, 0.86)        | 0.02 (-0.38, 0.43)                          | 0.07 (-0.20, 0.37)    |
| 4                              | Multi -pollutant | 3636 | 0.27 (-0.42, 0.94)        | -0.22 (-0.80, 0.35)                         | 0.11 (-0.30, 0.54)    |

Model 1 adjusted for baseline age, gender, race, study region and air pollutant and time-varying height and weight

Model 2 = Model 1 +, physical activity, income, employment status, occupational exposure to gases and fume, SES index, SES\*study region, time-varying smoking status, pack years, cigarettes per day, second hand smoking, education, BMI, temperature;

Model 3 = Model 2 + emphysema, cold, flu, or sore throat in past two weeks, bronchitis in past two weeks, asthma before the age of 45, and pneumonia in past two weeks;

Model 4 = Model 2 + all the other pollutants (i.e. O<sub>3</sub>, NOx, PM<sub>2.5</sub>);



**eTable 11 Longitudinal changes in lung function (95% CI) per 3 ppb increase of O<sub>3</sub> assessed during following over 10 years stratified by personal factors**

| Effect modification <sup>a</sup> | N    | FEV <sub>1</sub> (ml)    | P-value <sup>b</sup> | FVC (ml)                  | P-value <sup>b</sup> |
|----------------------------------|------|--------------------------|----------------------|---------------------------|----------------------|
| Gender                           |      |                          | 0.42                 |                           | 0.43                 |
| Male                             | 1843 | -15.03 (-33.51, 3.45)    |                      | -36.02 (-60.90, -11.14)   |                      |
| Female                           | 1796 | -21.48 (-40.13, -2.83)   |                      | -44.62 (-69.74, -19.49)   |                      |
| Baseline Age                     |      |                          | 0.15                 |                           | 0.37                 |
| <65                              | 1735 | -13.04 (-31.22, 5.13)    |                      | -35.75 (-60.22, -11.28)   |                      |
| ≥65                              | 1901 | -24.71 (-43.68, -5.74)   |                      | -45.50 (-71.03, -19.97)   |                      |
| Race                             |      |                          | 0.99                 |                           | 0.94                 |
| White                            | 1321 | -17.91 (-40.04, 4.22)    |                      | -34.73 (-64.64, -4.81)    |                      |
| Chinese                          | 583  | -13.74 (-50.17, 22.69)   |                      | -40.54 (-89.02, 7.93)     |                      |
| Black                            | 923  | -19.87 (-42.29, 2.55)    |                      | -43.16 (-73.40, -12.92)   |                      |
| Hispanic                         | 809  | -19.53 (-46.71, 7.65)    |                      | -44.57 (-81.06, -8.07)    |                      |
| Smoking status                   |      |                          | <0.01                |                           | 0.02                 |
| Never                            | 1695 | -12.36 (-31.17, 6.46)    |                      | -33.57 (-58.87, -8.28)    |                      |
| Former                           | 1597 | -18.89 (-37.38, -0.39)   |                      | -40.55 (-65.47, -15.64)   |                      |
| Current                          | 342  | -66.16 (-102.28, -30.03) |                      | -101.45 (-149.81, -53.09) |                      |
| BMI                              |      |                          | 0.99                 |                           | 0.73                 |
| < 30                             | 2509 | -16.85 (-33.10, -0.60)   |                      | -39.63 (-63.01, -16.26)   |                      |
| ≥ 30                             | 1127 | -16.96 (-37.38, 3.47)    |                      | -35.67 (-63.22, -8.13)    |                      |
| Airflow obstruction <sup>c</sup> |      |                          | 0.05                 |                           | 0.30                 |
| No                               | 2810 | -13.22 (-30.49, 4.05)    |                      | -35.24 (-58.41, -12.06)   |                      |
| Yes                              | 826  | -27.06 (-49.44, -4.68)   |                      | -48.73 (-78.72, -18.74)   |                      |
| NSES advantage <sup>d</sup>      |      |                          | 0.54                 |                           | 0.20                 |
| No                               | 1844 | -18.40 (-35.15, -1.65)   |                      | -40.93 (-63.48, -18.38)   |                      |
| Yes                              | 1792 | -16.81 (-34.07, 0.46)    |                      | -36.47 (-59.72, -13.23)   |                      |
| Study regions                    |      |                          | 0.93                 |                           | 0.11                 |
| Winston-Salem, NC                | 498  | -22.51 (-60.91, 15.9)    |                      | -25.07 (-77.16, 27.02)    |                      |
| New York, NY                     | 761  | -28.72 (-56.74, -0.69)   |                      | -81.13 (-119.82, -42.44)  |                      |
| Baltimore, MD                    | 435  | -4.60 (-70.59, 61.39)    |                      | -28.69 (-117.74, 60.35)   |                      |
| St. Paul, MN                     | 507  | -6.87 (-74.99, 61.25)    |                      | -13.09 (-104.61, 78.42)   |                      |
| Chicago, IL                      | 666  | -1.45 (-54.88, 51.98)    |                      | 30.29 (-40.79, 101.36)    |                      |
| Los Angeles, CA                  | 769  | -14.47 (-48.07, 19.12)   |                      | -35.40 (-80.40, 9.61)     |                      |

All models adjust for baseline age, gender, race, baseline O<sub>3</sub>, physical activity, income, employ status, occupational exposure, BMI, SES index, study region, SES\*study region, height, weight, temperature, smoking status, pack years, cigarettes per day, second hand smoking, education, and interactions of these variables with time;

<sup>b</sup>P-value for the F-test of the three-way interaction between O<sub>3</sub>, follow up time, and stratification variable;

<sup>c</sup>Presence of airflow obstruction for FEV<sub>1</sub> and FVC is defined as a pre-bronchodilator FEV<sub>1</sub>/FVC ratio less than 0.7;

<sup>d</sup>Neighborhood Socio-Economic Status (NSES) index was constructed by factor analysis of indicators of neighborhood-level SES (wealth, income, education, employment and occupation). It was included as continuous variable (range: -11 to 24) with lower value indicating more socioeconomic disadvantage. A cut-off point at 0 was considered in the analysis of the effect modification.

**eTable 12 Main and sensitivity analyses of effect estimates (95% CIs) of exposure to air pollution concentrations assessed at baseline in 2000 with longitudinal changes of lung function over 10 years from staged models**

| Model                          | Description      | N    | O <sub>3</sub><br>(3 ppb) | PM <sub>2.5</sub><br>(2 µg/m <sup>3</sup> ) | NO <sub>x</sub><br>(10 ppb) | Black carbon<br>(0.2 µg/m <sup>3</sup> ) <sup>a</sup> |
|--------------------------------|------------------|------|---------------------------|---------------------------------------------|-----------------------------|-------------------------------------------------------|
| <b>FEV<sub>1</sub> (ml)</b>    |                  |      |                           |                                             |                             |                                                       |
| 1                              | Base             | 3636 | -15.31 (-30.13, -0.50)    | -2.19 (-17.03, 12.66)                       | -7.87 (-15.68, -0.07)       | -2.08 (-15.71, 11.54)                                 |
| 2                              | Primary          | 3636 | -13.41 (-26.11, -0.71)    | 4.91 (-11.03, 20.84)                        | -8.15 (-17.33, 1.03)        | -2.79 (-17.34, 11.77)                                 |
| 3                              | Extended         | 3631 | -12.55 (-24.65, -0.45)    | 5.03 (-10.90, 20.96)                        | -7.92 (-17.09, 1.26)        | -2.80 (-17.34, 11.75)                                 |
| 4                              | Multi -pollutant | 3636 | -18.64 (-36.38, -0.91)    | 9.92 (-15.77, 35.62)                        | -13.66 (-32.58, 5.26)       | 1.83 (-18.60, 22.27)                                  |
| <b>FVC (ml)</b>                |                  |      |                           |                                             |                             |                                                       |
| 1                              | Base             | 3636 | -27.19 (-48.18, -6.20)    | -1.16 (-21.11, 18.79)                       | -7.04 (-17.56, 3.47)        | 0.22 (-18.14, 18.59)                                  |
| 2                              | Primary          | 3636 | -28.09 (-49.46, -6.72)    | 6.02 (-15.44, 27.47)                        | -5.74 (-18.13, 6.66)        | -1.13 (-20.79, 18.52)                                 |
| 3                              | Extended         | 3631 | -26.56 (-47.94, -5.18)    | 6.94 (-14.52, 28.41)                        | -5.55 (-17.94, 6.85)        | -1.20 (-20.85, 18.45)                                 |
| 4                              | Multi -pollutant | 3636 | -24.09 (-47.43, -0.76)    | 12.12 (-22.93, 47.17)                       | -10.72 (-36.52, 15.08)      | -0.87 (-28.55, 26.80)                                 |
| <b>FEV<sub>1</sub>/FVC (%)</b> |                  |      |                           |                                             |                             |                                                       |
| 1                              | Base             | 3636 | 0.27 (-0.27, 0.82)        | 0.04 (-0.30, 0.38)                          | -0.06 (-0.20, 0.12)         | -0.04 (-0.35, 0.27)                                   |
| 2                              | Primary          | 3636 | 0.31 (-0.27, 0.88)        | 0.12 (-0.24, 0.49)                          | -0.08 (-0.30, 0.13)         | -0.04 (-0.37, 0.30)                                   |
| 3                              | Extended         | 3631 | 0.29 (-0.27, 0.86)        | 0.10 (-0.26, 0.46)                          | -0.08 (-0.30, 0.13)         | -0.05 (-0.39, 0.28)                                   |
| 4                              | Multi-pollutant  | 3636 | 0.27 (-0.42, 0.94)        | 0.29 (-0.20, 0.78)                          | -0.20 (-0.50, 0.11)         | 0.00 (-0.47, 0.47)                                    |

Model1 adjusted for baseline age, gender, race, study region and air pollutant and time-varying height and weight;

Model 2 = Model 1 +, physical activity, income, employment status, occupational exposure to gases and fume, SES index, SES\*study region, time-varying smoking status, pack years, cigarettes per day, second hand smoking, education, BMI, temperature;

Model 3 = Model 2 + emphysema, cold, flu, or sore throat in past two weeks, bronchitis in past two weeks, asthma before the age of 45, pneumonia in past two weeks;

Model 4 = Model 2 + all the other pollutants (i.e. O<sub>3</sub>, NO<sub>x</sub>, PM<sub>2.5</sub>, Black carbon);

<sup>a</sup>Average concentration between 2006-08.

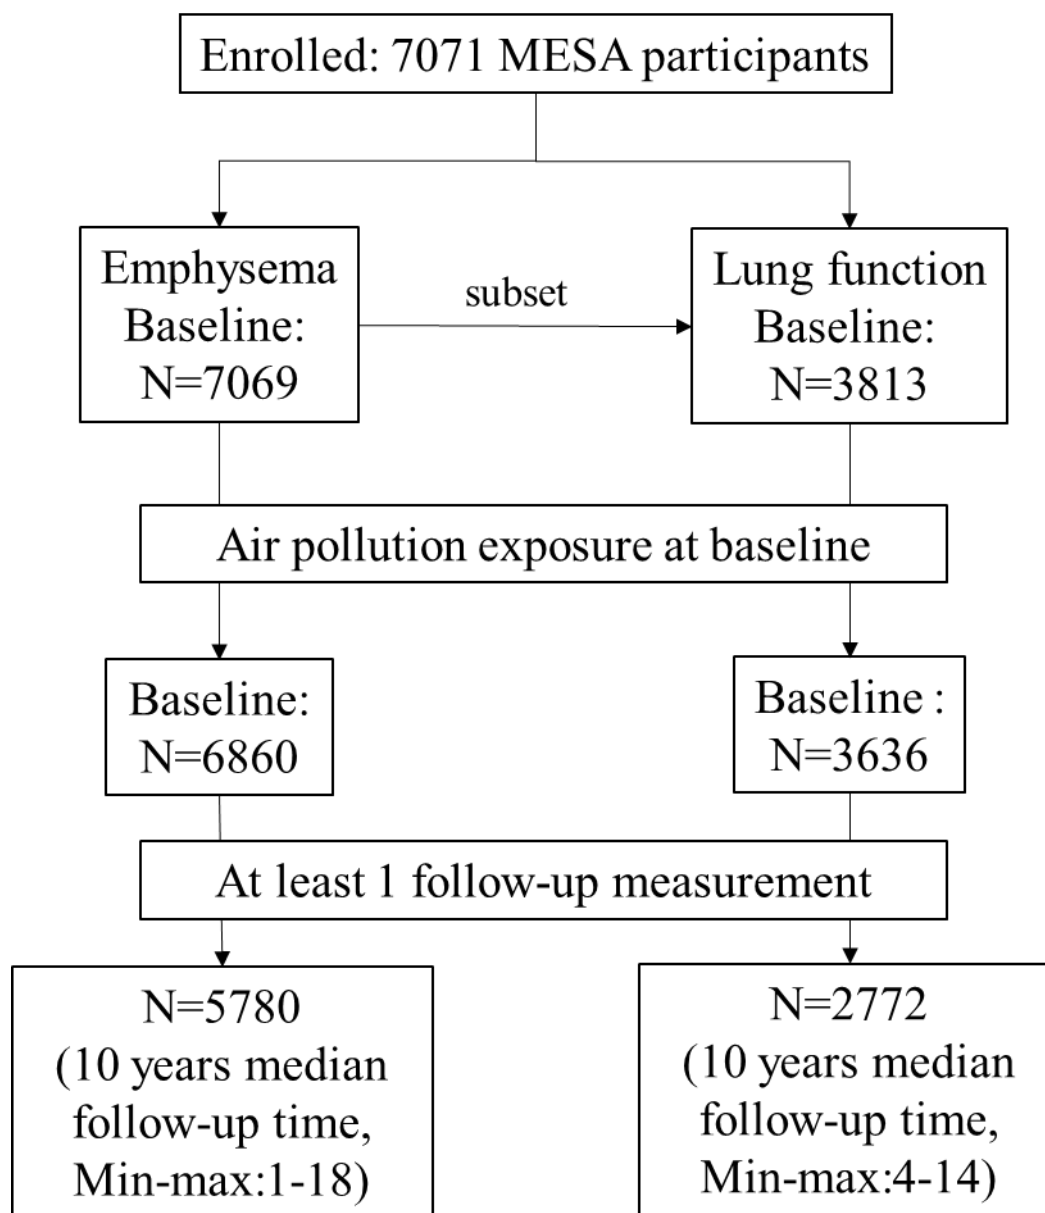

| MESA Exam Year | 1<br>(2000-02) | 2<br>(2002-04) | 3<br>(2004-05) | 4<br>(2005-07) | 5<br>(2010-11) | 6<br>(2016-18) |
|----------------|----------------|----------------|----------------|----------------|----------------|----------------|
| Emphysema      | 6812           | 5703           |                | 1559           | 3197           | 2308           |
| Lung function  |                |                | 3813           |                | 2539           | 1672           |

**eFigure 1 Participant recruitment, retention, and flow of outcome testing in the analysis of percent emphysema and lung function in the Multi-Ethnic Study of Atherosclerosis.**

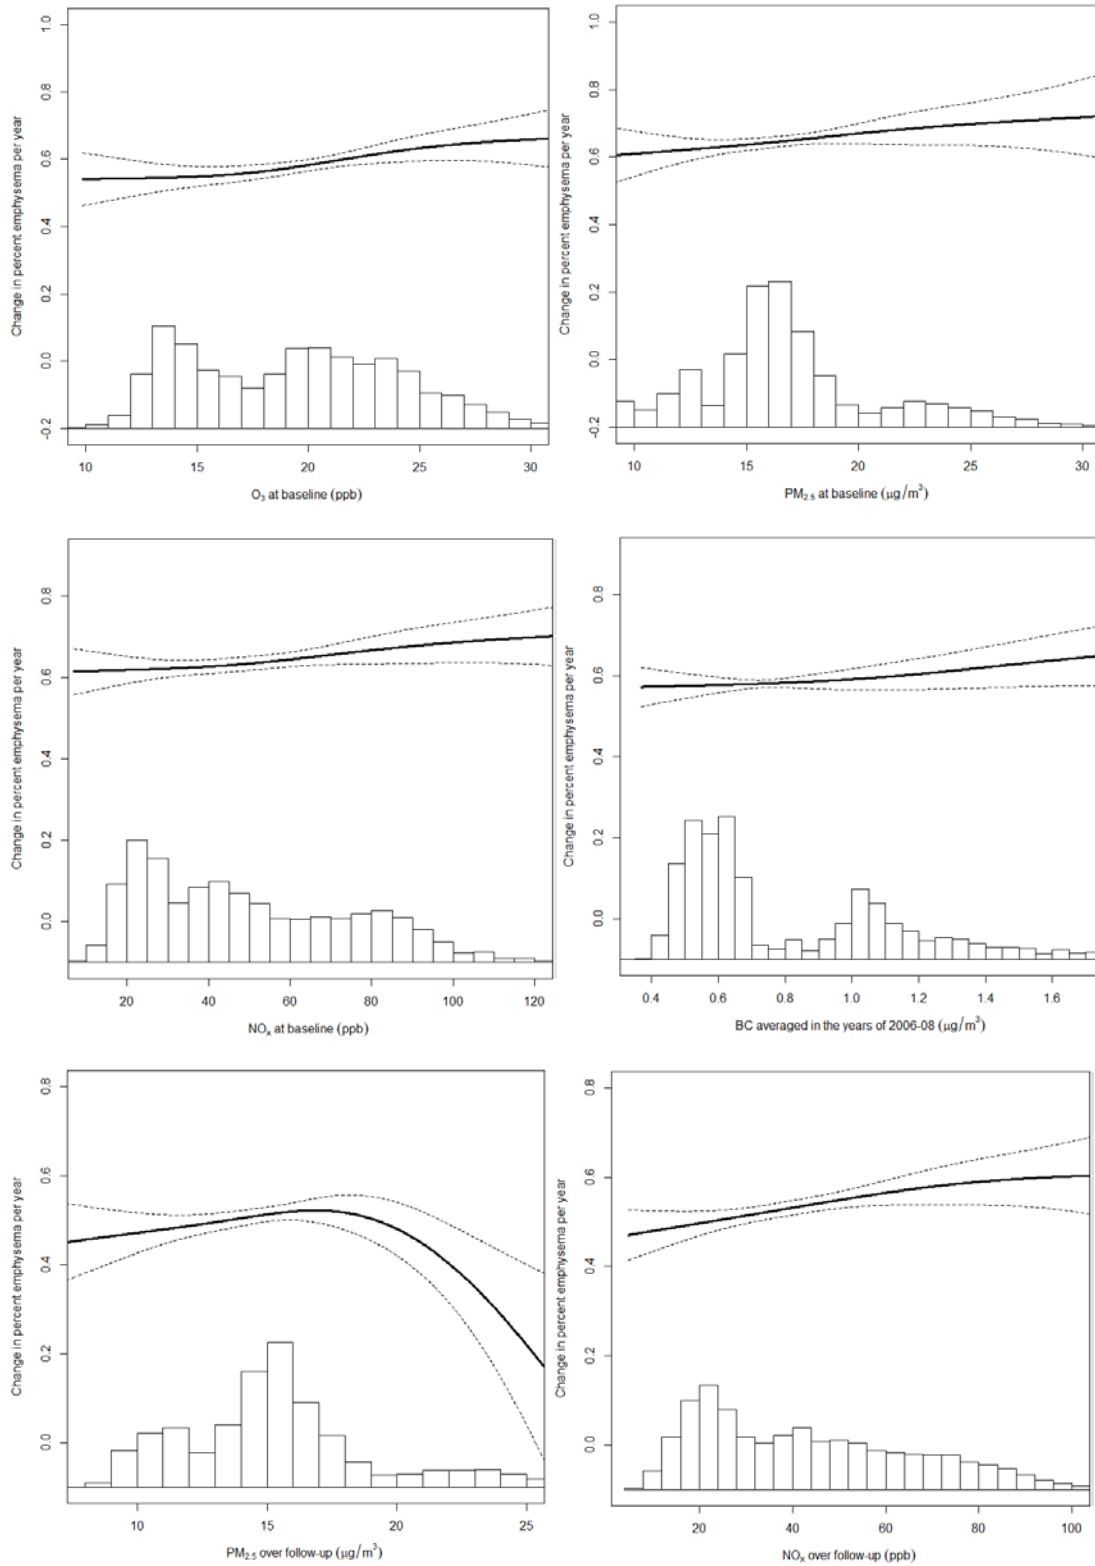

**eFigure 2 Concentration-response curves with 95%CI for the overall change of percent emphysema progression rate associated with air pollution concentrations, assessed at baseline in 2000 and over follow-up (N=6860).**

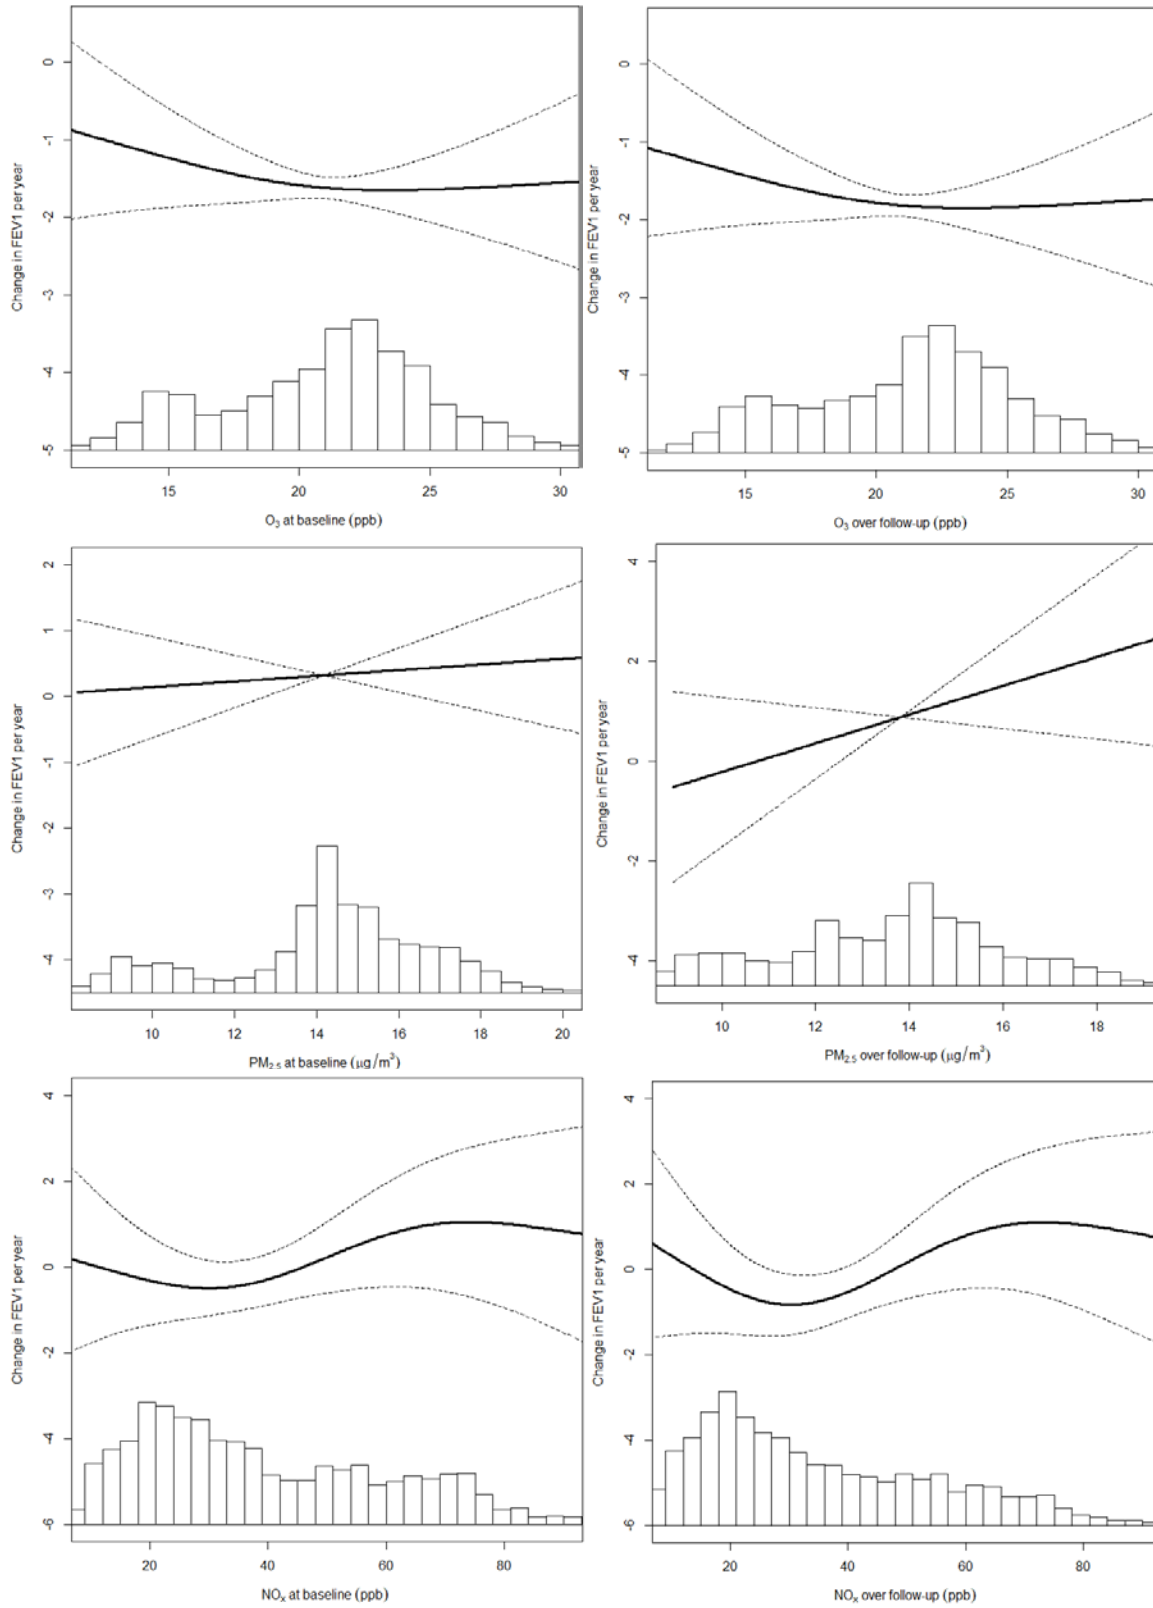

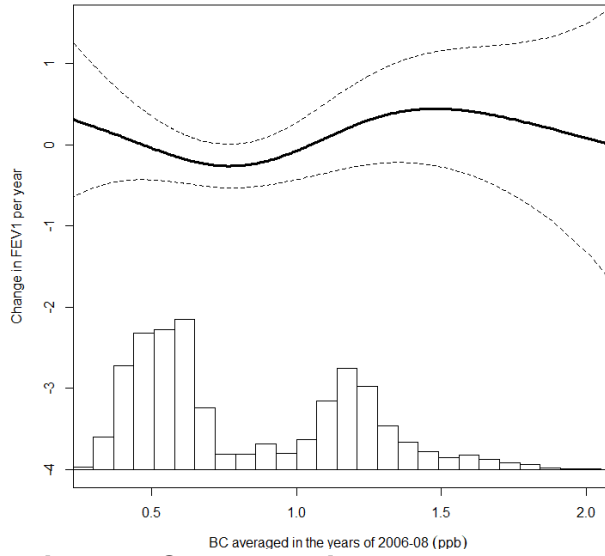

**eFigure 3 Concentration-response curve with 95%CI for the change of FEV1 associated with air pollution concentrations, assessed at baseline in 2000 and over follow-up (N=3636).**

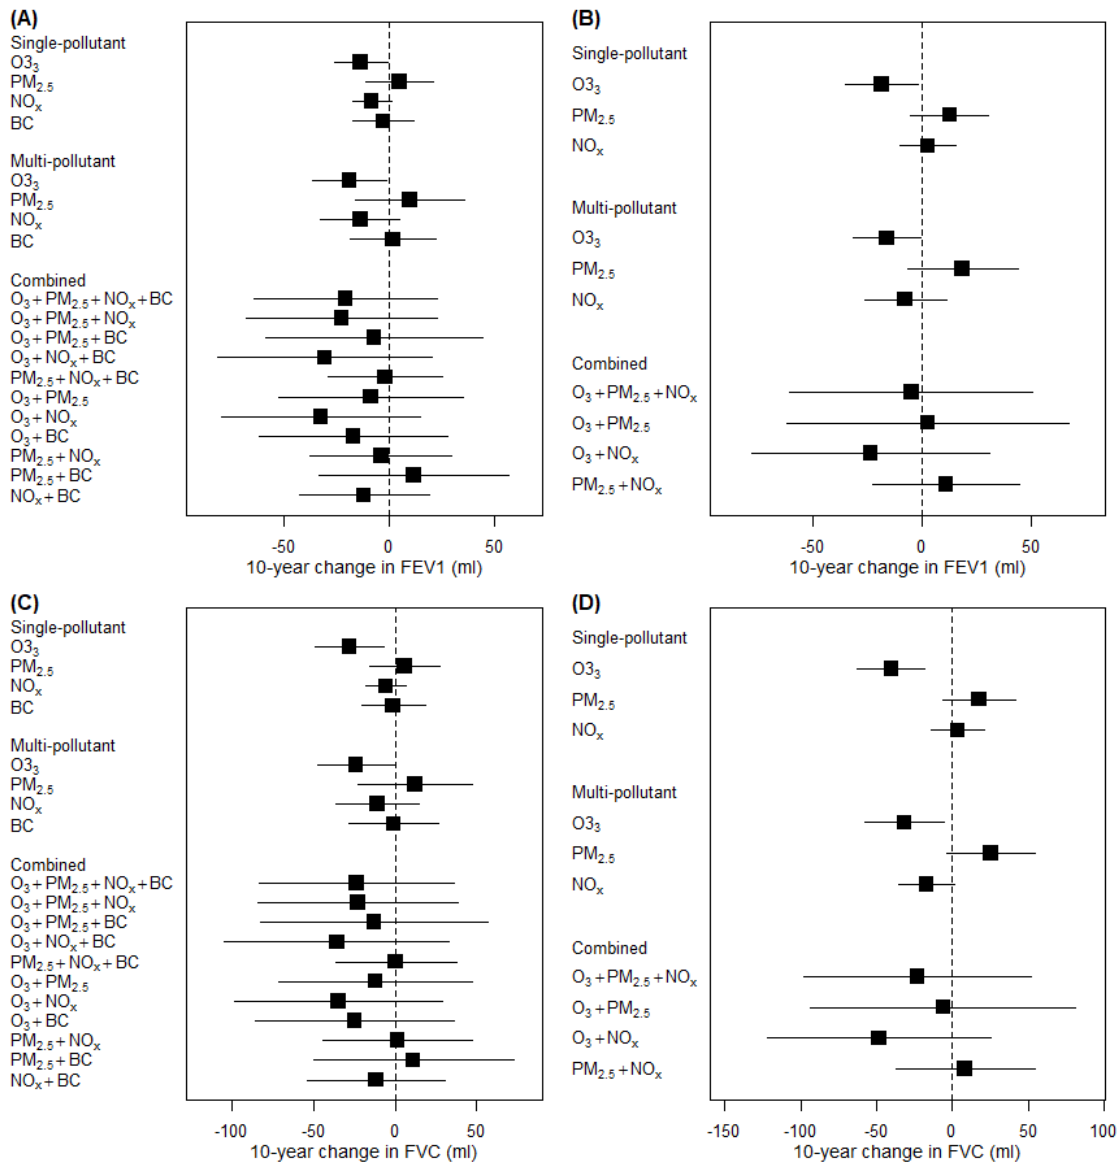

**eFigure 4** Effect estimates for the associations between air pollutants and lung function decline (N=3636). Results from single-pollutant model, multiple-pollutant model and linear combination model for the effect estimates of multiple air pollutant exposures (A: at baseline for FEV1, B: over follow-up for FEV1, C: at baseline for FVC, and D: over follow-up for FVC), from multi-pollutant models.
